# Supplementary material for: Functional Effects of Cardiomyocyte Injury in COVID-19
Source: PubMed Central journal article supplement (PMC8791272; doi:10.1128/jvi.01063-21), 2022-01-26
Supplement: jvi.01063-21-s0001.pdf [file jvi.01063-21-s0001.pdf]

# Supplementary

## Title: Functional effects of cardiomyocyte injury in COVID-19

Figure S1

A

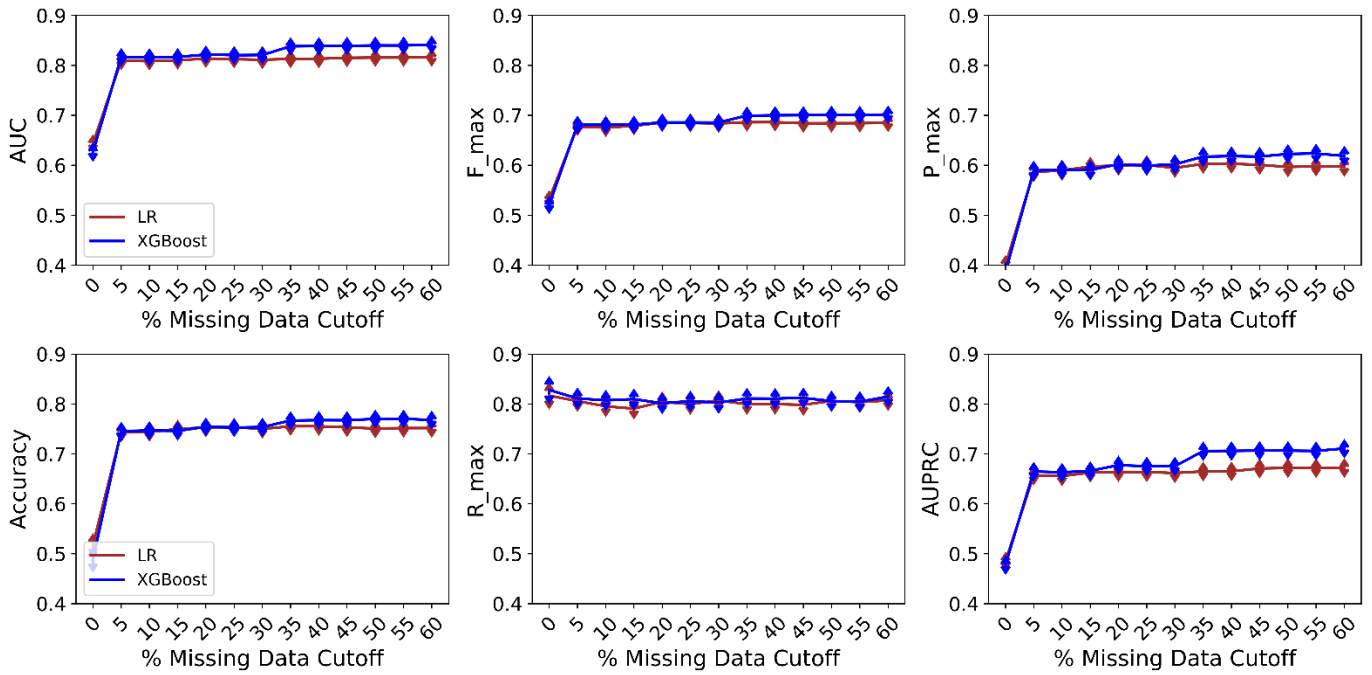

B

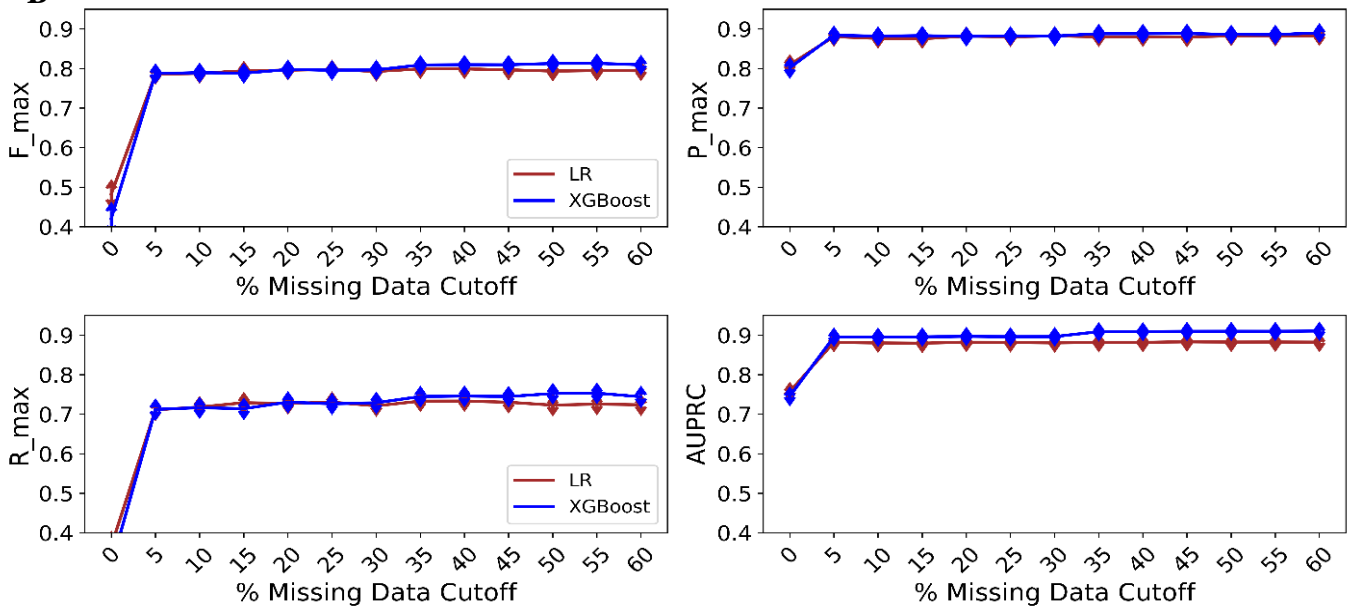

Figure S2

A

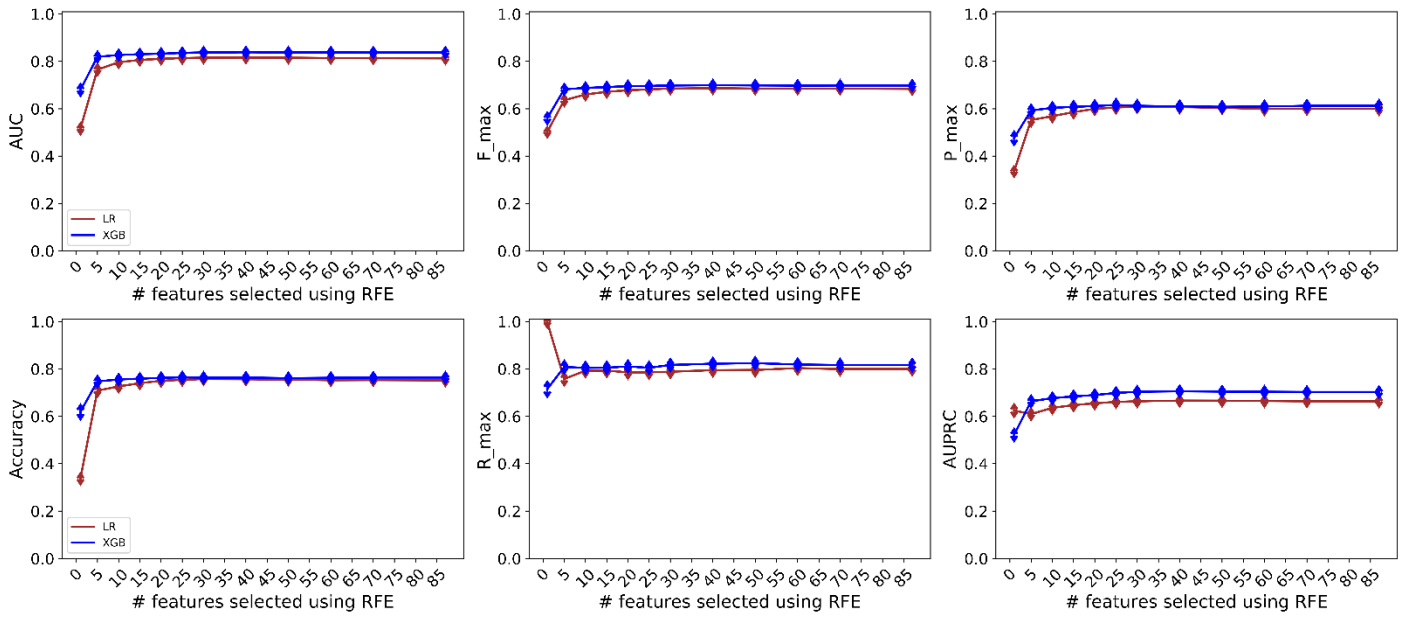

B

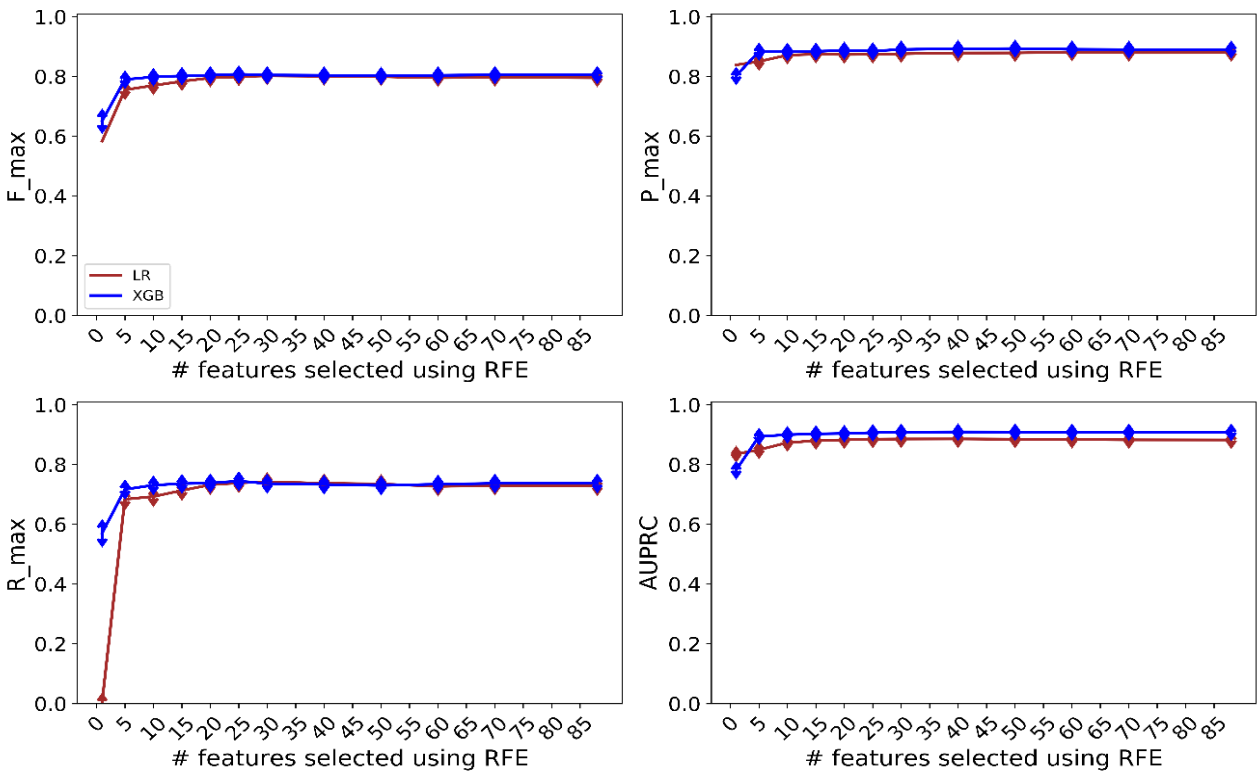

Figure S3

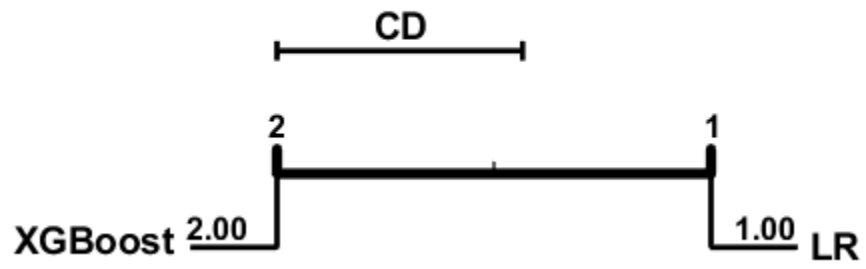

# Supplementary Figure 4

A.

48 hrs infection

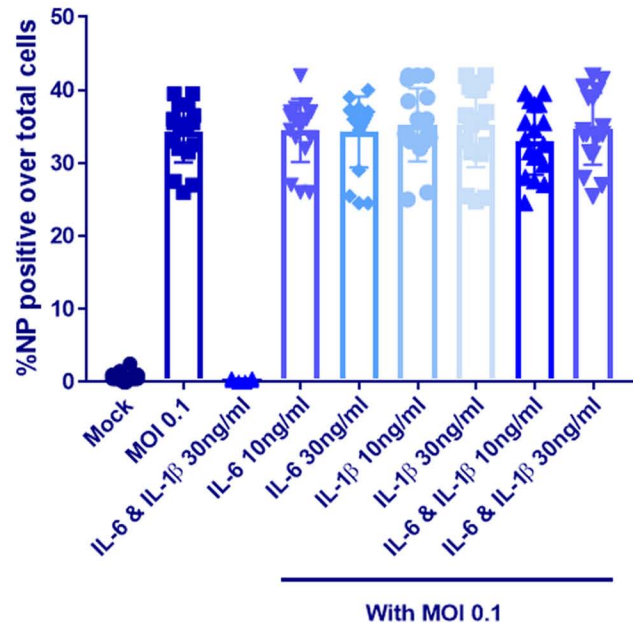

72 hrs infection

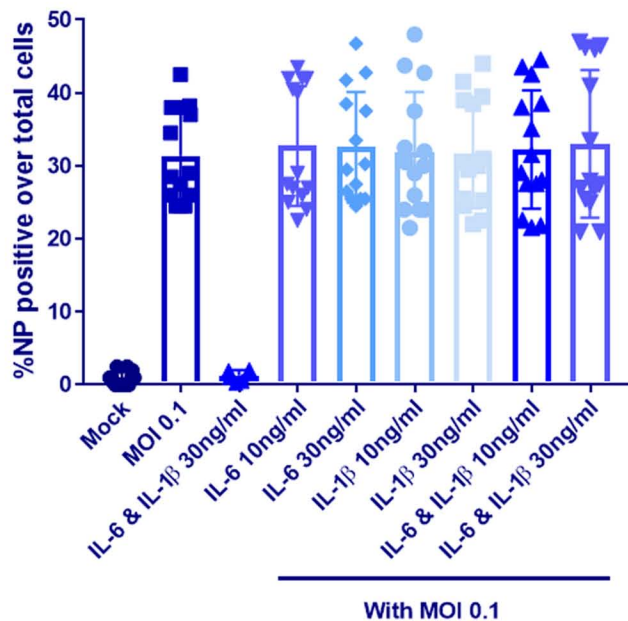

B.

48 hrs infection

SARS-CoV-2 MOI 0.1

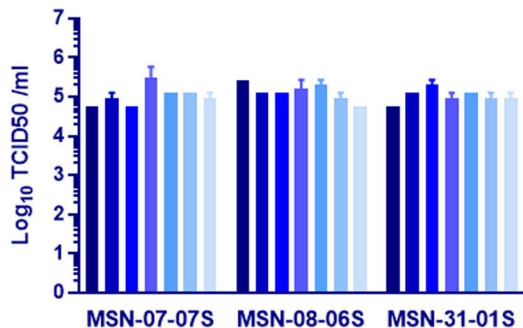

72 hrs infection

SARS-CoV-2 MOI 0.1

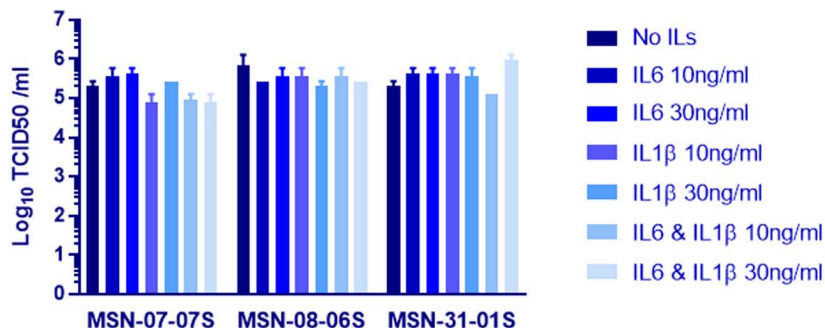

| <b>TABLE S1</b>                            | <b>Development Set (n = 3382) , 80 % of July 15th data</b> |                                               |                                           |                  |
|--------------------------------------------|------------------------------------------------------------|-----------------------------------------------|-------------------------------------------|------------------|
| <b>Variables<br/>(Continous Variables)</b> | <b>Total<br/>(n=3382)</b>                                  | <b>Without Cardiac<br/>Disease (n = 2510)</b> | <b>With Cardiac<br/>Disease (n =872 )</b> | <b>P-values*</b> |
| AGE                                        | 68.39 (14.67)                                              | 66.69 (14.97)                                 | 73.27 (12.55)                             | 3.04E-35         |
| ALBUMIN                                    | 2.47 (0.71)                                                | 2.47 (0.72)                                   | 2.46 (0.67)                               | 0.720983         |
| ALT                                        | 148.88 (506.51)                                            | 155.88 (533.02)                               | 128.9 (421.48)                            | 0.134413         |
| ANION_GAP                                  | 16.9 (5.56)                                                | 16.82 (5.66)                                  | 17.12 (5.29)                              | 0.154926         |
| AST                                        | 259.19 (1114.6)                                            | 271.19 (1192.09)                              | 224.71 (853.44)                           | 0.223857         |
| BASOPHIL (%)                               | 0.78 (0.88)                                                | 0.76 (0.86)                                   | 0.81 (0.93)                               | 0.160497         |
| BMI                                        | 28.48 (7.48)                                               | 28.45 (7.53)                                  | 28.54 (7.38)                              | 0.761675         |
| BRAIN NATRIURETIC PROTEIN                  | 513.78 (1381.68)                                           | 308.59 (1012.71)                              | 985.62 (1903.89)                          | 8.21E-19         |
| BUN                                        | 55.96 (44.61)                                              | 53.69 (44.76)                                 | 62.47 (43.54)                             | 4.03E-07         |
| C-REACTIVE PROTEIN                         | 189.23 (121.25)                                            | 194.3 (122.47)                                | 174.42 (116.42)                           | 7.79E-05         |
| CALCIUM                                    | 8.92 (0.9)                                                 | 8.92 (0.9)                                    | 8.93 (0.88)                               | 0.697778         |
| CHLORIDE                                   | 109.97 (8.85)                                              | 110.07 (8.84)                                 | 109.67 (8.88)                             | 0.252780         |
| D-DIMER                                    | 5.47 (5.44)                                                | 5.63 (5.55)                                   | 5.0 (5.05)                                | 0.005945         |
| DIASTOLIC_BP                               | 73.92 (15.17)                                              | 74.12 (14.81)                                 | 73.34 (16.15)                             | 0.229716         |
| DIASTOLIC_BP_MIN                           | 48.36 (15.83)                                              | 49.13 (15.94)                                 | 46.16 (15.28)                             | 2.03E-06         |
| DIASTOL_BP_MAX                             | 96.81 (17.48)                                              | 96.14 (17.3)                                  | 98.73 (17.85)                             | 0.000283         |
| EGFR                                       | 35.44 (28.9)                                               | 37.45 (30.48)                                 | 30.28 (23.63)                             | 3.91E-11         |
| EOSINOPHIL #                               | 0.2 (0.39)                                                 | 0.2 (0.42)                                    | 0.2 (0.31)                                | 0.759916         |
| EOSINOPHIL (%)                             | 2.27 (3.35)                                                | 2.18 (3.3)                                    | 2.52 (3.46)                               | 0.014025         |
| FERRITIN                                   | 1139.88 (1865.7)                                           | 1169.3 (1913.5)                               | 1053.59 (1716.18)                         | 0.126327         |
| GLUCOSE                                    | 274.63 (204.43)                                            | 272.5 (209.56)                                | 280.74 (188.93)                           | 0.281756         |
| HCO3 VENOUS                                | 26.53 (6.02)                                               | 26.29 (6.08)                                  | 27.19 (5.81)                              | 0.000601         |
| HEART_RATE                                 | 95.66 (20.67)                                              | 97.08 (20.09)                                 | 91.56 (21.77)                             | 2.54E-10         |
| HEART_RATE_MAX                             | 120.21 (26.38)                                             | 119.84 (25.67)                                | 121.3 (28.3)                              | 0.189528         |
| HEMOGLOBIN                                 | 10.56 (2.81)                                               | 10.71 (2.82)                                  | 10.14 (2.72)                              | 1.11E-07         |
| INR                                        | 1.57 (1.15)                                                | 1.49 (0.93)                                   | 1.8 (1.58)                                | 1.30E-06         |
| INTERLEUKIN-6                              | 659.3 (7774.61)                                            | 771.59 (8948.25)                              | 318.14 (839.28)                           | 0.066442         |
| LDH                                        | 751.96 (1181.87)                                           | 772.7 (1296.4)                                | 689.58 (734.37)                           | 0.037313         |
| LYMPHOCYTE #                               | 1.71 (2.37)                                                | 1.74 (2.55)                                   | 1.64 (1.78)                               | 0.227937         |
| LYMPHOCYTE (%)                             | 21.06 (12.0)                                               | 21.14 (12.17)                                 | 20.83 (11.49)                             | 0.495127         |
| MCH                                        | 30.6 (2.87)                                                | 30.61 (2.83)                                  | 30.59 (2.97)                              | 0.910013         |

|                            |               |                |                |          |
|----------------------------|---------------|----------------|----------------|----------|
| MCHC                       | 33.61 (1.47)  | 33.66 (1.49)   | 33.45 (1.41)   | 0.000131 |
| MCV                        | 93.22 (7.76)  | 93.03 (7.63)   | 93.76 (8.1)    | 0.018952 |
| MEAN PLATELET VOLUME (MPV) | 9.61 (1.68)   | 9.53 (1.69)    | 9.83 (1.64)    | 7.49E-06 |
| MONOCYTE #                 | 0.89 (0.65)   | 0.88 (0.68)    | 0.9 (0.53)     | 0.473918 |
| MONOCYTE (%)               | 10.16 (5.27)  | 10.0 (5.16)    | 10.62 (5.53)   | 0.003678 |
| NEUTROPHIL #               | 21.2 (94.88)  | 22.31 (109.32) | 18.02 (22.19)  | 0.063645 |
| NEUTROPHIL (%)             | 66.42 (15.79) | 66.55 (15.81)  | 66.06 (15.73)  | 0.432086 |
| O2 SATURATION VENOUS       | 79.36 (22.51) | 79.4 (22.81)   | 79.26 (21.65)  | 0.882016 |
| O2SAT_MIN                  | 81.2 (20.03)  | 81.09 (20.3)   | 81.55 (19.23)  | 0.561668 |
| O2_SAT                     | 93.06 (7.6)   | 92.79 (7.82)   | 93.82 (6.86)   | 0.000385 |
| PCO2 VENOUS                | 49.31 (15.62) | 49.0 (15.8)    | 50.17 (15.08)  | 0.078335 |
| PH VENOUS                  | 7.42 (0.08)   | 7.42 (0.08)    | 7.42 (0.08)    | 0.378739 |
| PLATELET                   | 180.5 (88.63) | 183.73 (90.44) | 171.23 (82.58) | 0.000181 |
| PO2 VENOUS                 | 78.62 (55.71) | 79.92 (56.74)  | 75.08 (52.69)  | 0.045458 |
| POTASSIUM                  | 5.31 (1.62)   | 5.3 (1.77)     | 5.36 (1.05)    | 0.238833 |
| PROCALCITONIN              | 7.0 (36.47)   | 6.72 (35.22)   | 7.83 (40.02)   | 0.518561 |
| PTT                        | 53.95 (38.33) | 53.19 (38.06)  | 56.09 (39.04)  | 0.098288 |
| RBC COUNT                  | 4.5 (0.77)    | 4.54 (0.75)    | 4.39 (0.83)    | 5.97E-06 |
| RESPIRATORY_RATE           | 21.34 (5.89)  | 21.28 (5.77)   | 21.52 (6.22)   | 0.347297 |
| RESP_RATE_MAX              | 33.91 (20.6)  | 33.64 (20.02)  | 34.7 (22.2)    | 0.227068 |
| SERUM CREATININE           | 3.21 (3.86)   | 3.04 (3.61)    | 3.7 (4.48)     | 8.19E-05 |
| SODIUM                     | 142.84 (8.85) | 142.8 (8.86)   | 142.95 (8.84)  | 0.681707 |
| SYSTOLIC_BP                | 131.03 (25.6) | 130.59 (24.99) | 132.33 (27.27) | 0.109561 |
| SYSTOLIC_BP_MIN            | 89.03 (25.38) | 89.76 (25.36)  | 86.92 (25.31)  | 0.005323 |
| SYSTOL_BP_MAX              | 166.41 (26.8) | 165.08 (26.97) | 170.24 (25.94) | 1.07E-06 |
| TEMPERATURE                | 98.98 (1.97)  | 99.06 (2.11)   | 98.74 (1.48)   | 1.35E-06 |
| TEMP_MAX                   | 100.86 (2.08) | 100.93 (2.17)  | 100.66 (1.8)   | 0.000517 |
| TOTAL BILIRUBIN            | 1.25 (2.64)   | 1.26 (2.95)    | 1.22 (1.43)    | 0.653973 |
| TOTAL_PROTEIN              | 7.2 (0.9)     | 7.23 (0.91)    | 7.11 (0.88)    | 0.001205 |
| WBC                        | 14.82 (10.73) | 14.91 (10.85)  | 14.54 (10.37)  | 0.362529 |

### Categorical Variables

|                             |  |  |  |             |
|-----------------------------|--|--|--|-------------|
| ACUTE KIDNEY INJURY, No (%) |  |  |  | 0.882585941 |
|-----------------------------|--|--|--|-------------|

|                                                     |              |             |              |             |
|-----------------------------------------------------|--------------|-------------|--------------|-------------|
| No                                                  | 3128 (92.5)  | 2320 (92.4) | (808 ( 92.7) |             |
| Yes                                                 | 254 (7.5)    | 190 (7.6)   | 64 ( 7.3 )   |             |
| <b>ACUTE MI, No (%)</b>                             |              |             |              | 5.86E-09    |
| No                                                  | 3316 (98.0)  | 2482 (98.9) | (834 ( 95.6) |             |
| Yes                                                 | 66 ( 2.0)    | 28 (1.1)    | 38 ( 4.4 )   |             |
| <b>ACUTE VENOUS THROMBOEMBOLISM, No (%)</b>         |              |             |              | 0.754975725 |
| No                                                  | 3354 ( 99.2) | 2488 (99.1) | (866 ( 99.3) |             |
| Yes                                                 | 28 ( 0.8)    | 22 (0.9)    | 6 ( 0.7 )    |             |
| <b>ALCOHOLIC NONALCOHOLIC LIVER DISEASE, No (%)</b> |              |             |              | 0.336100166 |
| No                                                  | 3308 ( 97.8) | 2451 (97.6) | (857 ( 98.3) |             |
| Yes                                                 | 74 ( 2.2)    | 59 (2.4)    | 15 ( 1.7 )   |             |
| <b>ARDS, No (%)</b>                                 |              |             |              | 0.883856262 |
| No                                                  | 3358 ( 99.3) | 2492 (99.3) | (866 ( 99.3) |             |
| Yes                                                 | 24 ( 0.7)    | 18 (0.7)    | 6 ( 0.7 )    |             |
| <b>ASTHMA, No (%)</b>                               |              |             |              | 7.20E-06    |
| No                                                  | 3225 ( 95.4) | 2418 (96.3) | (807 ( 92.5) |             |
| Yes                                                 | 157 ( 4.6)   | 92 (3.7)    | 65 ( 7.5 )   |             |
| <b>CANCER FLAG, No (%)</b>                          |              |             |              | 0.001842591 |
| No                                                  | 3073 ( 90.9) | 2304 (91.8) | (769 ( 88.2) |             |
| Yes                                                 | 309 ( 9.1)   | 206 (8.2)   | 103 ( 11.8 ) |             |
| <b>CEREBRAL INFARCTION, No (%)</b>                  |              |             |              | 0.395566942 |
| No                                                  | 3346 ( 98.9) | 2486 (99.0) | (860 ( 98.6) |             |
| Yes                                                 | 36 ( 1.1)    | 24 (1.0)    | 12 ( 1.4 )   |             |
| <b>CHRONIC KIDNEY DISEASE, No (%)</b>               |              |             |              | 3.25E-45    |
| No                                                  | 2898 ( 85.7) | 2277 (90.7) | (621 ( 71.2) |             |
| Yes                                                 | 484 ( 14.3)  | 233 (9.3)   | 251 ( 28.8 ) |             |
| <b>CHRONIC VIRAL HEPATITIS, No (%)</b>              |              |             |              | 0.933475607 |
| No                                                  | 3346 ( 98.9) | 2483 (98.9) | (863 ( 99.0) |             |
| Yes                                                 | 36 ( 1.1)    | 27 (1.1)    | 9 ( 1.0 )    |             |
| <b>COPD, No (%)</b>                                 |              |             |              | 3.53E-22    |
| No                                                  | 3205 ( 94.8) | 2434 (97.0) | (771 ( 88.4) |             |
| Yes                                                 | 177 ( 5.2)   | 76 (3.0)    | 101 ( 11.6 ) |             |
| <b>CROHNS DISEASE, No (%)</b>                       |              |             |              | 0.792032466 |

|                                         |              |             |              |             |
|-----------------------------------------|--------------|-------------|--------------|-------------|
| No                                      | 3375 ( 99.8) | 2505 (99.8) | (870 ( 99.8) |             |
| Yes                                     | 7 ( 0.2)     | 5 (0.2)     | 2 ( 0.2 )    |             |
| <b>DIABETES, No (%)</b>                 |              |             |              | 9.52E-43    |
| No                                      | 2484 ( 73.4) | 1998 (79.6) | (486 ( 55.7) |             |
| Yes                                     | 898 ( 26.6)  | 512 (20.4)  | 386 ( 44.3 ) |             |
| <b>ENCOUNTER TYPE, No (%)</b>           |              |             |              | 0.888291625 |
| Inpatient                               | 3147 (93.1)  | 2337 (93.1) | 810 (92.9)   |             |
| Other                                   | 235 (6.9)    | 173 (6.9)   | 62 (7.1)     |             |
| <b>HIV FLAG, No (%)</b>                 |              |             |              | 0.940816165 |
| No                                      | 3317 ( 98.1) | 2461 (98.0) | 856 (98.2)   |             |
| Yes                                     | 65 ( 1.9)    | 49 (2.0)    | 16 (1.8)     |             |
| <b>HYPERTENSION, No (%)</b>             |              |             |              | 7.58E-93    |
| No                                      | 1991 ( 58.9) | 1734 (69.1) | 257 (29.5)   |             |
| Yes                                     | 1391 ( 41.1) | 776 (30.9)  | 615 (70.5)   |             |
| <b>ICU, No (%)</b>                      |              |             |              | 0.323233683 |
| No                                      | 2429 ( 71.8) | 1813 (72.2) | 616 (70.6)   |             |
| Yes                                     | 707 ( 20.9)  | 514 (20.5)  | 193 (22.1)   |             |
| <b>INPATIENT NON ICU, No (%)</b>        |              |             |              | 0.003910682 |
| No                                      | 573 (16.9)   | 453 (18.0)  | 120 (13.8)   |             |
| Yes                                     | 2563 ( 75.8) | 1874 (74.7) | 689 (79.0)   |             |
| <b>INTRACEREBRAL HEMORRHAGE, No (%)</b> |              |             |              | 0.543395076 |
| No                                      | 3378 ( 99.9) | 2506 (99.8) | 872 (100.0)  |             |
| Yes                                     | 4 (0.1)      | 4 (0.2)     | 0 (0.0)      |             |
| <b>OBESITY, No (%)</b>                  |              |             |              | 1.45E-12    |
| No                                      | 3100 ( 91.7) | 2351 (93.7) | 749 (85.9)   |             |
| Yes                                     | 282 ( 8.3)   | 159 (6.3)   | 123 (14.1)   |             |
| <b>OBSTRUCTIVE SLEEP APNEA, No (%)</b>  |              |             |              | 3.78E-06    |
| No                                      | 3302 ( 97.6) | 2469 (98.4) | 833 (95.5)   |             |
| Yes                                     | 80 ( 2.4)    | 41 (1.6)    | 39 (4.5)     |             |
| <b>RACE ETHNICITY COMBINED, No (%)</b>  |              |             |              | 5.13E-05    |
| ASIAN                                   | 157 (4.6)    | 118 (4.7)   | 39 (4.5)     |             |
| BLACK OR AFRICAN-AMERICAN               | 918 (27.1)   | 694 (27.6)  | 224 (25.7)   |             |
| HISPANIC                                | 923 (27.3)   | 686 (27.3)  | 237 (27.2)   |             |



|                                     |              |             |            |             |
|-------------------------------------|--------------|-------------|------------|-------------|
| WHITE                               | 798 (23.6)   | 538 (21.4)  | 260 (29.8) |             |
| OTHER                               | 457 (13.5)   | 367 (14.6)  | 90 (10.3)  |             |
| NATIVE HAWAIIAN OR PACIFIC ISLANDER | 1 (0.0)      | 1 (0.0)     | 0 (0.0)    |             |
| AMERICAN INDIAN OR ALASKA NATIVE    | 1 (0.0)      | 1 (0.0)     | 0 (0.0)    |             |
| <b>SEX, No (%)</b>                  |              |             |            | 0.77155788  |
| MALE                                | 1993 ( 58.9) | 1475 (58.8) | 518 (59.4) |             |
| FEMALE                              | 1389 ( 41.1) | 1035 (41.2) | 354 (40.6) |             |
| <b>SMOKING , No (%)</b>             |              |             |            | 9.65E-13    |
| NEVER                               | 1701 ( 50.3) | 1266 (50.4) | 435 (49.9) |             |
| Current                             | 153 (4.5)    | 117 (4.7)   | 36 (4.1)   |             |
| Past                                | 807 (23.9)   | 483 (19.2)  | 324 (37.2) |             |
| PASSIVE                             | 2 (0.1)      | 1 (0.0)     | 1 (0.1)    |             |
| <b>ULCERATIVE COLITIS, No (%)</b>   |              |             |            | 0.925026688 |
| No                                  | 3369 ( 99.6) | 2501 (99.6) | 868 (99.5) |             |
| Yes                                 | 13 ( 0.4)    | 9 (0.4)     | 4 (0.5)    |             |

\*P-value from student t-test for continuous variables and chisquare test for categorical variables

| <b>TABLE S1</b>                             | <b>Test Set (n = 846), 20% of 15th July data</b> |                                              |                                           |                  |
|---------------------------------------------|--------------------------------------------------|----------------------------------------------|-------------------------------------------|------------------|
| <b>Variables<br/>(Continuous Variables)</b> | <b>Total<br/>(n=846)</b>                         | <b>Without Cardiac<br/>Disease (n = 653)</b> | <b>With Cardiac<br/>Disease (n = 193)</b> | <b>P-values*</b> |
| AGE                                         | 67.47 (15.71)                                    | 65.88 (16.38)                                | 72.85 (11.76)                             | 1.44E-10         |
| ALBUMIN                                     | 2.44 (0.69)                                      | 2.45 (0.69)                                  | 2.42 (0.69)                               | 0.616719         |
| ALT                                         | 128.37 (517.97)                                  | 119.3 (540.1)                                | 158.17 (437.36)                           | 0.310716         |
| ANION_GAP                                   | 16.79 (5.1)                                      | 16.52 (5.09)                                 | 17.7 (5.04)                               | 0.004923         |
| AST                                         | 224.13 (1291.02)                                 | 218.91 (1427.38)                             | 241.51 (661.54)                           | 0.763038         |
| BASOPHIL (%)                                | 0.87 (2.63)                                      | 0.88 (2.95)                                  | 0.81 (0.93)                               | 0.565992         |
| BMI                                         | 28.83 (7.46)                                     | 29.32 (7.67)                                 | 27.4 (6.63)                               | 0.001363         |
| BRAIN NATRIURETIC PROTEIN                   | 513.83 (1279.54)                                 | 294.63 (764.67)                              | 1120.09 (2016.66)                         | 1.29E-06         |
| BUN                                         | 55.54 (44.87)                                    | 53.05 (45.01)                                | 63.96 (43.43)                             | 0.002619         |
| C-REACTIVE PROTEIN                          | 195.09 (127.66)                                  | 204.24 (130.53)                              | 163.3 (111.79)                            | 9.26E-05         |
| CALCIUM                                     | 8.96 (0.82)                                      | 8.95 (0.83)                                  | 9.0 (0.79)                                | 0.424453         |
| CHLORIDE                                    | 110.11 (8.65)                                    | 110.08 (8.58)                                | 110.19 (8.87)                             | 0.876153         |
| D-DIMER                                     | 5.59 (5.45)                                      | 5.93 (5.62)                                  | 4.35 (4.57)                               | 0.000498         |
| DIASTOLIC_BP                                | 73.54 (15.2)                                     | 74.06 (14.49)                                | 71.77 (17.35)                             | 0.108707         |
| DIASTOLIC_BP_MIN                            | 48.33 (15.59)                                    | 49.14 (15.85)                                | 45.6 (14.35)                              | 0.004165         |
| DIASTOL_BP_MAX                              | 96.98 (17.73)                                    | 96.87 (17.51)                                | 97.37 (18.51)                             | 0.743188         |
| EGFR                                        | 35.41 (28.73)                                    | 37.87 (29.86)                                | 27.78 (23.41)                             | 5.99E-06         |
| EOSINOPHIL #                                | 0.22 (0.49)                                      | 0.23 (0.53)                                  | 0.22 (0.3)                                | 0.798222         |
| EOSINOPHIL (%)                              | 2.56 (3.53)                                      | 2.47 (3.45)                                  | 2.87 (3.81)                               | 0.191102         |
| FERRITIN                                    | 1236.76 (2344.07)                                | 1039.09 (1330.44)                            | 1915.9 (4216.83)                          | 0.009662         |
| GLUCOSE                                     | 274.94 (195.55)                                  | 271.99 (197.48)                              | 284.9 (189.05)                            | 0.411366         |
| HCO3 VENOUS                                 | 26.38 (5.33)                                     | 26.35 (5.19)                                 | 26.47 (5.8)                               | 0.811889         |
| HEART_RATE                                  | 97.18 (20.33)                                    | 98.92 (20.08)                                | 91.31 (20.15)                             | 1.01E-05         |
| HEART_RATE_MAX                              | 120.38 (24.43)                                   | 120.44 (23.97)                               | 120.19 (25.98)                            | 0.906720         |
| HEMOGLOBIN                                  | 10.54 (2.78)                                     | 10.67 (2.8)                                  | 10.1 (2.71)                               | 0.010942         |
| INR                                         | 1.51 (0.96)                                      | 1.44 (0.92)                                  | 1.74 (1.04)                               | 0.001209         |
| INTERLEUKIN-6                               | 373.43 (994.97)                                  | 385.3 (1073.65)                              | 330.66 (637.93)                           | 0.530598         |
| LDH                                         | 716.0 (927.29)                                   | 708.12 (960.19)                              | 743.53 (804.15)                           | 0.647665         |
| LYMPHOCYTE #                                | 1.7 (1.35)                                       | 1.7 (1.36)                                   | 1.67 (1.34)                               | 0.808482         |
| LYMPHOCYTE (%)                              | 21.65 (12.33)                                    | 21.71 (12.25)                                | 21.43 (12.65)                             | 0.787784         |
| MCH                                         | 30.36 (2.79)                                     | 30.31 (2.75)                                 | 30.5 (2.92)                               | 0.430252         |

|                            |                |                |                |          |
|----------------------------|----------------|----------------|----------------|----------|
| MCHC                       | 33.62 (1.4)    | 33.7 (1.37)    | 33.34 (1.44)   | 0.002191 |
| MCV                        | 92.36 (7.5)    | 91.96 (7.34)   | 93.71 (7.87)   | 0.006400 |
| MEAN PLATELET VOLUME (MPV) | 9.58 (1.6)     | 9.5 (1.61)     | 9.84 (1.52)    | 0.008070 |
| MONOCYTE #                 | 0.9 (0.55)     | 0.91 (0.54)    | 0.9 (0.57)     | 0.902433 |
| MONOCYTE (%)               | 10.15 (4.75)   | 10.08 (4.73)   | 10.4 (4.84)    | 0.420691 |
| NEUTROPHIL #               | 18.81 (22.93)  | 19.11 (23.17)  | 17.8 (22.13)   | 0.478494 |
| NEUTROPHIL (%)             | 65.89 (15.73)  | 65.89 (16.1)   | 65.87 (14.41)  | 0.986668 |
| O2 SATURATION VENOUS       | 79.93 (22.03)  | 79.72 (21.94)  | 80.68 (22.38)  | 0.642645 |
| O2SAT_MIN                  | 82.18 (18.58)  | 82.48 (18.27)  | 81.2 (19.6)    | 0.431577 |
| O2_SAT                     | 93.37 (7.18)   | 92.91 (7.65)   | 94.92 (4.99)   | 3.42E-05 |
| PCO2 VENOUS                | 48.71 (14.47)  | 48.34 (14.34)  | 49.98 (14.85)  | 0.221491 |
| PH VENOUS                  | 7.42 (0.07)    | 7.43 (0.07)    | 7.42 (0.07)    | 0.165882 |
| PLATELET                   | 181.56 (85.45) | 186.18 (85.81) | 166.03 (82.55) | 0.003407 |
| PO2 VENOUS                 | 78.07 (55.87)  | 75.94 (54.1)   | 85.32 (61.15)  | 0.096001 |
| POTASSIUM                  | 5.28 (1.06)    | 5.24 (1.04)    | 5.43 (1.11)    | 0.036127 |
| PROCALCITONIN              | 9.54 (43.63)   | 10.24 (46.62)  | 7.11 (31.06)   | 0.331820 |
| PTT                        | 53.48 (36.92)  | 51.81 (35.49)  | 58.96 (40.93)  | 0.058061 |
| RBC COUNT                  | 4.57 (0.78)    | 4.62 (0.74)    | 4.39 (0.86)    | 0.000913 |
| RESPIRATORY_RATE           | 21.61 (5.83)   | 21.8 (5.98)    | 20.98 (5.25)   | 0.075160 |
| RESP_RATE_MAX              | 33.53 (19.68)  | 33.58 (18.94)  | 33.38 (22.06)  | 0.911150 |
| SERUM CREATININE           | 3.2 (3.6)      | 2.94 (3.41)    | 4.07 (4.07)    | 0.000527 |
| SODIUM                     | 142.73 (8.23)  | 142.68 (8.28)  | 142.9 (8.07)   | 0.754595 |
| SYSTOLIC_BP                | 130.83 (26.08) | 130.65 (25.09) | 131.48 (29.28) | 0.729811 |
| SYSTOLIC_BP_MIN            | 89.25 (24.49)  | 90.7 (24.88)   | 84.36 (22.53)  | 0.001073 |
| SYSTOL_BP_MAX              | 165.42 (26.68) | 165.22 (26.46) | 166.11 (27.44) | 0.693991 |
| TEMPERATURE                | 99.04 (2.78)   | 99.2 (1.76)    | 98.47 (4.8)    | 0.044077 |
| TEMP_MAX                   | 100.93 (2.09)  | 101.03 (2.19)  | 100.61 (1.72)  | 0.006975 |
| TOTAL BILIRUBIN            | 1.17 (1.59)    | 1.15 (1.73)    | 1.22 (1.02)    | 0.486184 |
| TOTAL_PROTEIN              | 7.26 (0.92)    | 7.24 (0.87)    | 7.3 (1.09)     | 0.538424 |
| WBC                        | 14.66 (9.44)   | 14.8 (9.68)    | 14.2 (8.59)    | 0.407910 |

### Categorical Variables

|                             |  |  |  |            |
|-----------------------------|--|--|--|------------|
| ACUTE KIDNEY INJURY, No (%) |  |  |  | 0.62476289 |
|-----------------------------|--|--|--|------------|

|                                                     |             |             |              |            |
|-----------------------------------------------------|-------------|-------------|--------------|------------|
| No                                                  | 789 ( 93.3) | 611 ( 93.6) | 178 ( 92.2)  |            |
| Yes                                                 | 57 ( 6.7)   | 42 ( 6.4)   | 15 ( 7.8)    |            |
| <b>ACUTE MI, No (%)</b>                             |             |             |              | 0.13858252 |
| No                                                  | 832 ( 98.3) | 645 ( 98.8) | 187 ( 96.9)  |            |
| Yes                                                 | 14 ( 1.7)   | 8 ( 1.2)    | 6 ( 3.1)     |            |
| <b>ACUTE VENOUS THROMBOEMBOLISM, No (%)</b>         |             |             |              | 0.32113486 |
| No                                                  | 839 ( 99.2) | 646 ( 98.9) | 193 ( 100.0) |            |
| Yes                                                 | 7 ( 0.8)    | 7 ( 1.1)    | 0 (0.0)      |            |
| <b>ALCOHOLIC NONALCOHOLIC LIVER DISEASE, No (%)</b> |             |             |              | 0.11837316 |
| No                                                  | 812 ( 96.0) | 631 ( 96.6) | 181 ( 93.8)  |            |
| Yes                                                 | 34 ( 4.0)   | 22 ( 3.4)   | 12 ( 6.2)    |            |
| <b>ARDS, No (%)</b>                                 |             |             |              | 0.65864418 |
| No                                                  | 837 ( 98.9) | 645 ( 98.8) | 192 ( 99.5)  |            |
| Yes                                                 | 9 ( 1.1)    | 8 ( 1.2)    | 1 ( 0.5)     |            |
| <b>ASTHMA, No (%)</b>                               |             |             |              | 0.00750029 |
| No                                                  | 798 ( 94.3) | 624 ( 95.6) | 174 ( 90.2)  |            |
| Yes                                                 | 48 ( 5.7)   | 29 ( 4.4)   | 19 ( 9.8)    |            |
| <b>CANCER FLAG, No (%)</b>                          |             |             |              | 0.00771183 |
| No                                                  | 774 ( 91.5) | 607 ( 93.0) | 167 ( 86.5)  |            |
| Yes                                                 | 72 ( 8.5)   | 46 ( 7.0)   | 26 ( 13.5)   |            |
| <b>CEREBRAL INFARCTION, No (%)</b>                  |             |             |              | 0.65864418 |
| No                                                  | 837 ( 98.9) | 645 ( 98.8) | 192 ( 99.5)  |            |
| Yes                                                 | 9 ( 1.1)    | 8 ( 1.2)    | 1 ( 0.5)     |            |
| <b>CHRONIC KIDNEY DISEASE, No (%)</b>               |             |             |              | 5.04E-20   |
| No                                                  | 706 ( 83.5) | 587 ( 89.9) | 119 ( 61.7)  |            |
| Yes                                                 | 140 ( 16.5) | 66 ( 10.1)  | 74 ( 38.3)   |            |
| <b>CHRONIC VIRAL HEPATITIS, No (%)</b>              |             |             |              | 0.7212213  |
| No                                                  | 837 ( 98.9) | 647 ( 99.1) | 190 ( 98.4)  |            |
| Yes                                                 | 9 ( 1.1)    | 6 ( 0.9)    | 3 ( 1.6)     |            |
| <b>COPD, No (%)</b>                                 |             |             |              | 0.00193523 |
| No                                                  | 817 ( 96.6) | 638 ( 97.7) | 179 ( 92.7)  |            |
| Yes                                                 | 29 ( 3.4)   | 15 ( 2.3)   | 14 ( 7.3)    |            |
| <b>CROHNS DISEASE, No (%)</b>                       |             |             |              | 0.07826238 |

|                                         |             |              |             |            |
|-----------------------------------------|-------------|--------------|-------------|------------|
| No                                      | 844 ( 99.8) | 653 ( 100.0) | 191 ( 99.0) |            |
| Yes                                     | 2 ( 0.2)    | 0 (0.0)      | 2 ( 1.0)    |            |
| <b>DIABETES, No (%)</b>                 |             |              |             | 3.20E-12   |
| No                                      | 626 ( 74.0) | 521 ( 79.8)  | 105 ( 54.4) |            |
| Yes                                     | 220 ( 26.0) | 132 ( 20.2)  | [88 ( 45.6) |            |
| <b>ENCOUNTER TYPE, No (%)</b>           |             |              |             | 0.87109763 |
| Inpatient                               | 789 (93.3)  | 610 (93.4)   | 179 (92.7)  |            |
| Other                                   | 57 (6.7)    | 43 (6.6)     | 14 (7.3)    |            |
| <b>HIV FLAG, No (%)</b>                 |             |              |             | 0.65864418 |
| No                                      | 837 (98.9)  | 645 ( 98.8)  | 192 ( 99.5) |            |
| Yes                                     | 9 (1.1)     | 8 ( 1.2)     | 1 (0.5)     |            |
| <b>HYPERTENSION, No (%)</b>             |             |              |             | 1.34E-20   |
| No                                      | 505 (59.7)  | 446 ( 68.3)  | 59 (30.6)   |            |
| Yes                                     | 341 (40.3)  | 207 ( 31.7)  | 134 (69.4)  |            |
| <b>ICU, No (%)</b>                      |             |              |             | 0.74146061 |
| No                                      | 598 (70.7)  | 460 ( 70.4)  | 138 ( 71.5) |            |
| Yes                                     | 190 (22.5)  | 149 ( 22.8)  | 41 (21.2)   |            |
| <b>INPATIENT NON ICU, No (%)</b>        |             |              |             | 0.35425853 |
| No                                      | 144 (17.0)  | 116 (17.8)   | 28 (14.5)   |            |
| Yes                                     | 644 (76.1)  | 493 (75.5)   | 151 (78.2)  |            |
| <b>INTRACEREBRAL HEMORRHAGE, No (%)</b> |             |              |             | 0.94118182 |
| No                                      | 844 (99.8)  | 652 (99.8)   | 192 ( 99.5) |            |
| Yes                                     | 2 (0.2)     | 1 (0.2)      | 1 (0.5)     |            |
| <b>OBESITY, No (%)</b>                  |             |              |             | 0.68862702 |
| No                                      | 772 (91.3)  | 594 (91.0)   | 178 ( 92.2) |            |
| Yes                                     | 74 (8.7)    | 59 (9.0)     | 15 (7.8)    |            |
| <b>OBSTRUCTIVE SLEEP APNEA, No (%)</b>  |             |              |             | 0.51927591 |
| No                                      | 827 (97.8)  | 640 (98.0)   | 187 ( 96.9) |            |
| Yes                                     | 19 (2.2)    | 13 (2.0)     | 6 (3.1)     |            |
| <b>RACE ETHNICITY COMBINED, No (%)</b>  |             |              |             | 3.70E-05   |
| ASIAN                                   | 47 (5.6)    | 34 (5.2)     | 13 (6.7)    |            |
| BLACK OR AFRICAN-AMERICAN               | 221 (26.1)  | 178 (27.3)   | 43 (22.3)   |            |
| HISPANIC                                | 236 (27.9)  | 196 (30.0)   | 40 (20.7)   |            |

|                                     |             |             |             |            |
|-------------------------------------|-------------|-------------|-------------|------------|
| WHITE                               | 169 (20.0)  | 108 (16.5)  | 61 (31.6)   |            |
| OTHER                               | 139 (16.4)  | 114 (17.5)  | 25 (13.0)   |            |
| NATIVE HAWAIIAN OR PACIFIC ISLANDER | 0 (0.0)     | 0 (0.0)     | 0 (0.0)     |            |
| AMERICAN INDIAN OR ALASKA NATIVE    | 0 (0.0)     | 0 (0.0)     | 0 (0.0)     |            |
| <b>SEX, No (%)</b>                  |             |             |             | 0.75413949 |
| MALE                                | 497 (58.7)  | 386 (59.1)  | 111 ( 57.5) |            |
| FEMALE                              | 349 (41.3)  | 267 (40.9)  | 82 (42.5)   |            |
| <b>SMOKING , No (%)</b>             |             |             |             | 0.00115863 |
| NEVER                               | 439 (51.9)  | 345 (52.8)  | 94, 48.7    |            |
| Current                             | 37 (4.4)    | 26 (4.0)    | 11, 5.7     |            |
| Past                                | 187 (22.1)  | 121 (18.5)  | 66, 34.2    |            |
| PASSIVE                             | 0 (0.0)     | 0 (0.0)     | 0 (0.0)     |            |
| <b>ULCERATIVE COLITIS, No (%)</b>   |             |             |             |            |
| No                                  | 846 (100.0) | 653 (100.0) | 193 (100.0) | 1          |
| Yes                                 | 0 (0.0)     | 0 (0.0)     | 0 (0.0)     |            |

\*P-value from student t-test for continuous variables and chisquare test for categorical variables

| <b>TABLE S2- Variables<br/>(Continuous Variables)</b> | <b>Development Set<br/>(n = 3382)</b> | <b>Test Set<br/>(n = 846)</b> |
|-------------------------------------------------------|---------------------------------------|-------------------------------|
| AGE                                                   | 0                                     | 0                             |
| ALBUMIN                                               | 86                                    | 27                            |
| ALT                                                   | 92                                    | 27                            |
| ANION_GAP                                             | 8                                     | 6                             |
| AST                                                   | 137                                   | 37                            |
| BASOPHIL (%)                                          | 35                                    | 22                            |
| BMI                                                   | 520                                   | 136                           |
| BRAIN NATRIURETIC PROTEIN                             | 980                                   | 251                           |
| BUN                                                   | 7                                     | 5                             |
| C-REACTIVE PROTEIN                                    | 468                                   | 116                           |
| CALCIUM                                               | 5                                     | 5                             |
| CHLORIDE                                              | 4                                     | 3                             |
| D-DIMER                                               | 661                                   | 162                           |
| DIASTOLIC_BP                                          | 230                                   | 53                            |
| DIASTOLIC_BP_MIN                                      | 142                                   | 30                            |
| DIASTOL_BP_MAX                                        | 142                                   | 30                            |
| EGFR                                                  | 565                                   | 137                           |
| EOSINOPHIL #                                          | 79                                    | 22                            |
| EOSINOPHIL (%)                                        | 35                                    | 15                            |
| FERRITIN                                              | 499                                   | 123                           |
| GLUCOSE                                               | 4                                     | 5                             |
| HCO3 VENOUS                                           | 772                                   | 173                           |
| HEART_RATE                                            | 209                                   | 46                            |
| HEART_RATE_MAX                                        | 143                                   | 30                            |
| HEMOGLOBIN                                            | 7                                     | 4                             |
| INR                                                   | 832                                   | 206                           |
| INTERLEUKIN-6                                         | 1589                                  | 404                           |
| LDH                                                   | 617                                   | 163                           |
| LYMPHOCYTE #                                          | 79                                    | 22                            |
| LYMPHOCYTE (%)                                        | 29                                    | 13                            |
| MCH                                                   | 7                                     | 4                             |
| MCHC                                                  | 7                                     | 4                             |
| MCV                                                   | 7                                     | 4                             |
| MEAN PLATELET VOLUME (MPV)                            | 21                                    | 9                             |
| MONOCYTE #                                            | 79                                    | 22                            |
| MONOCYTE (%)                                          | 29                                    | 13                            |
| NEUTROPHIL #                                          | 11                                    | 9                             |
| NEUTROPHIL (%)                                        | 29                                    | 13                            |
| O2 SATURATION VENOUS                                  | 794                                   | 189                           |
| O2SAT_MIN                                             | 211                                   | 46                            |
| O2_SAT                                                | 211                                   | 46                            |
| PCO2 VENOUS                                           | 671                                   | 158                           |
| PH VENOUS                                             | 671                                   | 158                           |
| PLATELET                                              | 11                                    | 4                             |

|                  |     |     |
|------------------|-----|-----|
| PO2 VENOUS       | 852 | 204 |
| POTASSIUM        | 17  | 5   |
| PROCALCITONIN    | 642 | 160 |
| PTT              | 866 | 219 |
| RBC COUNT        | 7   | 4   |
| RESPIRATORY_RATE | 220 | 50  |
| RESP_RATE_MAX    | 146 | 33  |
| SERUM CREATININE | 7   | 5   |
| SODIUM           | 427 | 95  |
| SYSTOLIC_BP      | 230 | 53  |
| SYSTOLIC_BP_MIN  | 142 | 30  |
| SYSTOL_BP_MAX    | 142 | 30  |
| TEMPERATURE      | 209 | 46  |
| TEMP_MAX         | 209 | 46  |
| TOTAL BILIRUBIN  | 86  | 29  |
| TOTAL_PROTEIN    | 104 | 32  |
| WBC              | 8   | 4   |

### Categorical Variables

|                                      |     |     |
|--------------------------------------|-----|-----|
| ACUTE KIDNEY INJURY                  | 0   | 0   |
| ACUTE MI                             | 0   | 0   |
| ACUTE VENOUS THROMBOEMBOLISM         | 0   | 0   |
| ALCOHOLIC NONALCOHOLIC LIVER DISEASE | 0   | 0   |
| ARDS                                 | 0   | 0   |
| ASTHMA                               | 0   | 0   |
| CANCER FLAG                          | 0   | 0   |
| CEREBRAL INFARCTION                  | 0   | 0   |
| CHRONIC KIDNEY DISEASE               | 0   | 0   |
| CHRONIC VIRAL HEPATITIS              | 0   | 0   |
| COPD                                 | 0   | 0   |
| CROHNS DISEASE                       | 0   | 0   |
| DIABETES                             | 0   | 0   |
| ENCOUNTER TYPE                       | 0   | 0   |
| HIV FLAG                             | 0   | 0   |
| HYPERTENSION                         | 0   | 0   |
| ICU                                  | 246 | 58  |
| INPATIENT NON ICU                    | 246 | 58  |
| INTRACEREBRAL HEMORRHAGE             | 0   | 0   |
| OBESITY                              | 0   | 0   |
| OBSTRUCTIVE SLEEP APNEA              | 0   | 0   |
| RACE ETHNICITY COMBINED              | 127 | 34  |
| SEX                                  | 0   | 0   |
| SMOKING                              | 719 | 183 |
| ULCERATIVE COLITIS                   | 0   | 0   |



**Supplementary Figure S1. Data driven assessment to determine optimal manner dealing with missing data during the model development process.** To evaluate the optimal manner in which to deal with features with missing data, different cutoffs were taken in 5% increments (0% to 60%) of missing data and using the training set, the mean-mode imputation method was evaluated (mean for continuous features, mode for categorical features). Two different classifiers (LR, XGBoost) were then trained at each of the percent missing data cutoffs on the training dataset and validated on the 20% validation dataset with subsequent evaluation by six different metrics (AUC, Accuracy, F\_max, R\_max, P\_max, AUPRC) in order to assess model performance at each cutoff. Each model was run 100 times for each missing data cutoff and the average of the performance was plotted for each metric for the **A.)** Troponin level more than 0.09 and **B.)** Troponin level less than equal to 0.09 (AUC and Accuracy are not presented as these are class independent metrics). Data points show the average AUC score for each candidate algorithm and missing value level, with error bars shown by whiskers. AUC – area under the receiver operating characteristic curve; AUPRC – area under the precision recall curve; LR – logistic regression; P\_max – precision maximum; R\_max – recall maximum; F\_max – f1-score which is harmonic mean of precision and recall ;XGBoost – extreme gradient boosting.

**Supplementary Figure S2. Results of recursive feature elimination during the model development phase using preoperative only dataset.** Recursive feature elimination is a feature selection method that fits a model and removes the weakest feature (or features) until the pre-specified number of features is reached. Various incremental percentages (0% to 100%) of the overall number of features (100% features = 86 features) were assessed. Two different classifiers (LR, XGBoost) were then trained at each of the percent missing data cutoffs on the training dataset 75% and validated on the 25% validation dataset with subsequent evaluation by six different metrics (AUC, Accuracy, Fmax, Rmax, Pmax, AUPRC) in order to assess model performance at each cutoff. Each model was run 100 times for each missing data cutoff and the average of the performance was plotted for each metric for the **A.)** Troponin level more than 0.09 and **B.)** Troponin level less than equal to 0.09 (AUC and Accuracy are not presented as these are class independent metrics). Data points show the average AUC score for each candidate algorithm and

missing value level, with error bars shown by whiskers. AUC – area under the receiver operating characteristic curve; AUPRC – area under the precision recall curve; LR – logistic regression; P\_max – precision maximum; R\_max – recall maximum; F\_max – f1-score which is harmonic mean of precision and recall; XGBoost – extreme gradient boosting.

**Supplementary Figure S3. The statistical comparison of two classification algorithms performances in the form of Critical Difference (CD) plots:** Classification algorithms, represented by (vertical + horizontal) lines, are displayed from left to right in terms of the average rank obtained by their resultant models in each of the 100 simulations on validation data set. The classifiers producing statistically significantly different performance because both classifiers are not connected by horizontal lines. These results show that the XGBoost is the best performer overall. The CD plots were drawn using open-source Matlab code.

**Supplementary Figure S4. ILs do not increase the infectivity of SARS-CoV-2 as determined by NP-positive staining and shedding of virus into culture media.**

(A) We counted the numbers of cells stained by N protein antibody as a measure of infectivity, using either IL-6 and/or IL-1 $\beta$  at 10 or 30ng/ml. Each point is representative from one well of a 96 well plate with 10,000 CM cells. The bar graph is the average of four different CM lines measuring viral NP protein positive cells over total number of cells. Counting was done in an automated fashion using the InCell Analyzer. No statistical difference was determined between infection alone or in any combination of ILs tested.

(B) ILs do not increase the percentage of CM cells infected by SARS-CoV-2. To confirm that CM were being productively infected and shedding SARS-CoV-2 into the culture media, we collected supernatants from 3 different CM lines 48 and 72hrs post-infection, with or without ILs and performed a TCID50 plaque assay. We observed that CM lines are infected and the level of infection, as assessed by virus release in to culture medium did not increase with the addition of IL-6 and IL-1 $\beta$ , there was no statistical difference detected for any condition when comparing to No ILs.

**Table S1. Descriptive characteristics of the overall development (80%) dataset, and 20% test dataset.** Characteristic table for development set and test set are presented. Both data sets further divided patients with and without cardiac disease. For continuous variables shown with mean and standard deviation in parentheses. Counts and percentages (in parentheses) are presented for categorical variables.

**Table S2: Missing value number of development set and test set.**

Data acquired from MSDW and many features have missing values which are listed in this table. It represents the number of missing values in development set and test set that are imputed by missing value imputation techniques in the model.

### **List of Supplementary Movies**

<https://iyengarlab.org/> - All movies are provided on our lab webpage.

Movie S1 – Live cell beating of hiPSC cardiomyocytes at 48hrs post infection with SARS-CoV-2. The movie has been sped up 6X and displays MSN08-06S CM line beating in the BSL3 in the following order: CM line MSN08-06S (8-48h): MOCK, Infection only at MOI 0.1, Interleukins (ILs) only (IL-6 and IL-1 $\beta$  each at 30ng/ml) and ILs with Infection.

All patients are confirmed to be COVID-19 positive and no history of cardiac disease. Movie 2 has normal LVEF, while 3 and 4 have newly reduced LVEF<51.

Movie S2 - Normal demonstrates an apical 4-chamber view (after administration of an ultrasonic enhancing agent) from a transthoracic echocardiogram. The findings are consistent with preserved left ventricular ejection fraction and no regional wall motion abnormalities. The end-diastolic and end-systolic volumes are 104ml and 35ml, respectively with a left ventricular ejection fraction of 66%.

Movie S3 – Regional Wall Motion Abnormality (RWMA) demonstrates an apical 3-chamber view (after administration of an ultrasonic enhancing agent) from a transthoracic

echocardiogram. The findings are consistent with basal and mid infero-lateral wall hypokinesis despite preserved left ventricular ejection fraction. The end-diastolic and end-systolic volumes are 102ml and 50ml, respectively with a left ventricular ejection fraction of 51%

Movie S4 – Diffuse demonstrates an apical 4-chamber view (after administration of an ultrasonic enhancing agent) from a transthoracic echocardiogram. The findings are consistent with diffuse left ventricular wall hypokinesis and mildly decreased left ventricular ejection fraction. The end-diastolic and end-systolic volumes are 160ml and 90ml, respectively with a left ventricular ejection fraction of 44%.
